# Supplementary material for: The effect of periodontitis on recipient outcomes after kidney transplantation
Source: PubMed Central journal article supplement — Kidney Res Clin Pract. 2022 Jan 24;41(1):114–23. doi: 10.23876/j.krcp.21.097 (PMC8816407; doi:10.23876/j.krcp.21.097), 2022-01-24
Supplement: j-krcp-21-097suppl1.pdf [file j-krcp-21-097suppl1.pdf]

**Supplementary Table 1.** Comparison of the characteristics in patients with mild and severe periodontitis before kidney transplantation

| Characteristic                       | Total         | Stage I and II | Stage III and IV | p-value |
|--------------------------------------|---------------|----------------|------------------|---------|
| Diabetes mellitus                    | 73 (24.5)     | 29 (15.4)      | 44 (40.0)        | <0.001  |
| Current smoking                      | 36 (11.9)     | 17 (8.9)       | 19 (17.3)        | 0.03    |
| Age (yr)                             | 43.97 ± 12.28 | 39.73 ± 11.97  | 51.43 ± 8.78     | <0.001  |
| Body mass index (kg/m <sup>2</sup> ) | 23.28 ± 3.75  | 22.57 ± 3.64   | 24.52 ± 3.63     | <0.001  |
| Ejection fraction of heart (%)       | 57.26 ± 7.19  | 57.93 ± 6.62   | 56.07 ± 7.99     | 0.03    |
| C-reactive protein (mg/L)            | 4.88 ± 15.41  | 3.57 ± 9.70    | 7.07 ± 21.96     | 0.11    |

Data are presented as number (%) or mean ± standard deviation.
