# Supplementary material for: The effect of periodontitis on recipient outcomes after kidney transplantation
Source: PubMed Central journal article supplement — Kidney Res Clin Pract. 2022 Jan 24;41(1):114–23. doi: 10.23876/j.krcp.21.097 (PMC8816407; doi:10.23876/j.krcp.21.097), 2022-01-24
Supplement: j-krcp-21-097suppl2.pdf [file j-krcp-21-097suppl2.pdf]

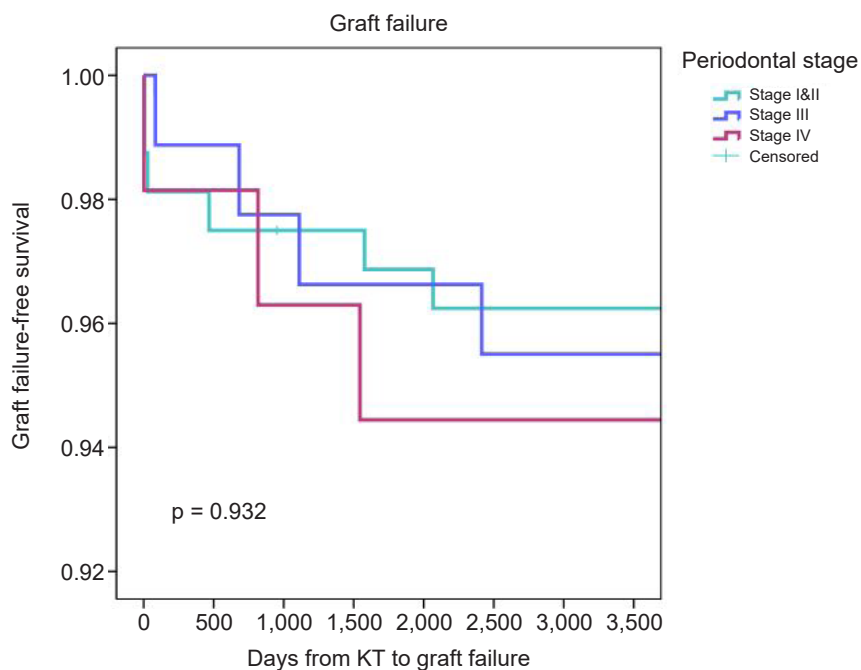

**Supplementary Figure 1.** Kaplan-Meier survival analysis comparing the graft failure rate between stages I & II, III, and IV.
